# Supplementary material for: Examining health system responsiveness policy in Kenya and South Africa: A content and framing analysis of policy documents 1994-2024
Source: Research Square preprint supplement (doi:10.21203/rs.3.rs-8624444/v1), 2026-02-23
Supplement: Supplementary file 1 [file 6ab492398e4d1c66398b3031.docx]

Supplementary Material 1: Policy documents reviewed in Kenya and South Africa

| **Documents reviewed** | |
| --- | --- |
| **South Africa** | **Kenya** |
| **Legislative instruments** | |
| Constitution of the Republic of South Africa, 1996 | Constitution of Kenya |
| National Health Act, 2003 | County Government Act, 2012 |
| National Health Amendment Act, 2013 | Public Finance Management Act, 2012 |
| National Health Insurance Bill, 2019 | Urban Areas and Cities Act, 2011 |
|  | Health Act, 2017 |
|  | Kenya Primary Health Care Act 2023 |
| **Broader public sector (beyond health) policy documents** | |
| Guide on Public Participation in Public Service (undated) | Public Participation Guidelines, 2016 |
| White paper on transforming public service delivery, 1997 |  |
| National Development Plan, 2012 |  |
| Framework for Strengthening Citizen-Government Partnerships for Monitoring Frontline Service Delivery 2013 |  |
| **Health Sector specific policy documents** | |
| White Paper for the Transformation of the Health System in South Africa, 1997 | Kenya Health Policy I 1994-2010 |
| National Patient's Charter, 1999 | Kenya Health Sector Strategic Plan I 1999-2004 |
| Re-engineering Primary Health Care in South Africa (Discussion Document), 2010 | Kenya Health Sector Strategic Plan II 2005-2010 |
| “Towards Quality Care for Patients” National Core Standards for Health Establishments in South Africa, 2011 | Taking KEPH to the community, 2006 |
| Medico-Legal Declaration implementation plan, 2016 | Community Strategy Implementation Guidelines 2006-2010 |
| National guideline on conducting patient experience of care surveys in public health establishments, 2017 | The Kenya Health Policy 2012-2030 |
| National Guideline for Patient Safety Incident Reporting and Learning in the Public Health Sector of South Africa (April 2017) | The Kenya Health Sector Strategic Plan III 2013-2017 |
| National guideline to manage complaints, compliments and suggestions in the health sector of South Africa, 2017 | Patient Rights Charter 2013 |
| Policy framework and strategy for Ward-based Primary Healthcare Outreach Teams (2018/19 - 2023/24) | Community Strategy 2014-2019 |
| Draft national guideline for management of patient waiting times at health facilities, 2019 | Kenya Health Sector Strategic Plan 2018-2022 |
| White Paper on National Health Insurance 2023 | Kenya Primary Healthcare Strategy 2019-2024 |
| 2nd presidential health compact 2024-2029 | Kenya Community Health Policy 2020-2030 |
| National Cancer Strategic framework 2017-2022 | Kenya Community Strategy for Health 2020-2025 |
| National policy and strategy on palliative care 2017-2022 | Kenya Mental Health Policy 2015-2030 |
| Policy on Quality in Healthcare for South Africa 2007 | Kenya UHC Policy 2020 |
| Ideal Clinic Framework and Manual | Kenya Palliative Care Policy 2022-2030 |
| National Digital Health Strategy for South Africa, 2019 - 2024 | Kenya Community Score Card Guidelines for Social Accountability in Primary Healthcare, 2023 |
