# Supplementary material for: Examining health system responsiveness policy in Kenya and South Africa: A content and framing analysis of policy documents 1994-2024
Source: Research Square preprint supplement (doi:10.21203/rs.3.rs-8624444/v1), 2026-02-23
Supplement: Supplementary file 2 [file b92b4e6dd5107ee070d19fb5.docx]

Supplementary Material 2: Framings of responsiveness identified across Kenyan and South African policy documents

| **Kenya documents** |  |  |  |  |  |
| --- | --- | --- | --- | --- | --- |
| **Document/Framing** | **Participation** | **Rights-based** | **Accountability** | **Service Feedback** | **WHO non-clinical framing** |
| Constitution of Kenya | X | X |  |  |  |
| County Government Act, 2012 | X | X |  |  |  |
| Public Finance Management Act, 2012 | X |  |  |  |  |
| Urban Areas and Cities Act, 2011 | X | X |  |  |  |
| Health Act, 2017 |  | X | X |  |  |
| Public Participation Guidelines, 2016 | X | X |  |  |  |
| Kenya Health Policy I 1994-2010 |  |  |  | X |  |
| Kenya Health Sector Strategic Plan I 1999-2004 |  |  |  | X |  |
| Kenya Health Sector Strategic Plan II 2005-2010 |  | X | X | X | X |
| Taking KEPH to the community, 2006 |  | X | X | X |  |
| Community Strategy Implementation Guidelines 2006-2010 |  | X | X | X |  |
| The Kenya Health Policy 2012-2030 |  |  |  | X | X |
| The Kenya Health Sector Strategic Plan III 2013-2017 |  |  |  | X |  |
| Patient Rights Charter 2013 |  | X | X |  |  |
| Community Strategy 2014-2019 |  |  | X |  |  |
| Kenya Health Sector Strategic Plan 2018-2022 |  |  | X | X |  |
| Kenya Primary Healthcare Strategy 2019-2024 |  |  |  | X |  |
| Kenya Community Health Policy 2020-2030 |  |  |  | X |  |
| Kenya Community Strategy for Health 2020-2025 |  |  |  | X |  |
| Kenya Mental Health Policy 2015-2030 |  | X | X |  | X |
| Kenya UHC Policy 2020 |  | X | X |  |  |
| Kenya Palliative Care Policy 2022-2030 |  |  | X | X |  |
| Kenya Primary Health Care Act 2023 |  |  |  | X |  |
| Kenya Community Score Card Guidelines for Social Accountability in Primary Healthcare, 2023 |  |  | X | X |  |

| **South Africa documents** |  |  |  |  |  |
| --- | --- | --- | --- | --- | --- |
| **Document/Framing** | **Participation** | **Rights-based** | **Accountability** | **Service feedback** | **Non-clinical WHO framing** |
| Constitution of the Republic of South Africa, 1996 | X | X |  |  |  |
| National Health Act, 2003 | X |  |  |  |  |
| National Health Amendment Act, 2013 |  |  | X |  |  |
| National Health Insurance Bill, 2019 |  |  |  |  |  |
| Guide on Public Participation in Public Service (undated) | X |  |  |  |  |
| White paper on transforming public service delivery, 1997 |  |  | X | X |  |
| National Development Plan, 2012 |  |  | X |  |  |
| Framework for Strengthening Citizen-Government Partnerships for Monitoring Frontline Service Delivery 2013 | X |  |  |  |  |
| White Paper for the Transformation of the Health System in South Africa, 1997 | X |  |  |  |  |
| National Patient's Charter, 1999 | X | X |  |  |  |
| Re-engineering Primary Health Care in South Africa (Discussion Document), 2010 | X |  |  |  |  |
| “Towards Quality Care for Patients” National Core Standards for Health Establishments in South Africa, 2011 |  | X | X | X | X |
| Medico-Legal Declaration implementation plan, 2016 |  |  | X | X |  |
| National guideline on conducting patient experience of care surveys in public health establishments, 2017 |  |  | X | X |  |
| National Guideline for Patient Safety Incident Reporting and Learning in the Public Health Sector of South Africa (April 2017) |  |  | X | X |  |
| National guideline to manage complaints, compliments and suggestions in the health sector of South Africa, 2017 |  |  | X | X |  |
| Policy framework and strategy for Ward-based Primary Healthcare Outreach Teams (2018/19 - 2023/24) | X |  |  |  |  |
| Draft national guideline for management of patient waiting times at health facilities, 2019 |  |  | X | X | X |
| White Paper on National Health Insurance 2023 |  |  |  | X |  |
| NHI Bill 2024 | X |  |  | X |  |
| 2nd presidential health compact 2024-2029 |  |  | X | X |  |
| National Cancer Strategic framework 2017-2022 |  | X |  | X |  |
| National policy and strategy on palliative care 2017-2022 |  | X |  | X |  |
| Policy on Quality in Healthcare for South Africa 2007 |  |  |  | X |  |
| Ideal Clinic Framework and Manual |  |  |  | X |  |
| National Digital Health Strategy for South Africa, 2019 - 2024 |  |  |  | X |  |
