# Supplementary material for: Examining health system responsiveness policy in Kenya and South Africa: A content and framing analysis of policy documents 1994-2024
Source: Research Square preprint supplement (doi:10.21203/rs.3.rs-8624444/v1), 2026-02-23
Supplement: Supplementary file 3 [file fc8e8aef3b89f5f3b38e2a27.docx]

| **Mechanism** | **Role /Responsibility in supporting responsiveness** |
| --- | --- |
| Kenya National Human Rights and Equality Commission (KNHREC) (Constitution Chapter 4:Part 5; Section 59) at national level | -Has a responsibility to investigate *'unresponsive'* official conduct and human rights violations [1] |
| County Budget and Economic Forum at county level[2, 3] | -Provides an avenue for consultation by the county government on matters relating to budgeting, economy & financial management, (Section 137 (3)[2] Has power and mandate to facilitate public participation in the county[3]. The CBEF is composed of Governor, County Executive Committee members, representatives of professionals, business, labour issues, women, persons with disabilities, the elderly and faith based groups at the county level (Section 137(2)[2] |
| Boards of cities and municipalities (at county level) | Responsibility to ensure that residents participate in decision making processes and that there are mechanisms that allow all persons (including those who cannot read and/or write) to participate in planning and to lodge complaints and petitions[4] |
| Village council-Comprises 3 to 5 village elders appointed by the Village administrator and vetted by County assembly (Section 53(1)[5] | -Has a responsibility for ensuring and co-ordinating participation of the village unit in governance (Section 53(1) |
| **South Africa** | |
| Human Rights Commission; Public Protector; SA Law Reform commission at national level | Protect the public from maladministration & impropriety by government departments [6-8] |
| The National Department of Performance Monitoring and Evaluation | Provide technical and funding support to service delivery departments to incorporate Citizen Based Monitoring (CBM) approaches into the service delivery value chain[9] |
| National Department of Public Service & Administration | Ensure that tools such as complaint systems and surveys are implemented in a manner that strengthens government’s responsiveness and accountability to users [10, 11] |
| **Health sector specific mechanisms** | |
| **Those immediately supporting health service feedback** | **Those supporting broader health system participation and responsiveness processes** |
| **Kenya** |  |
| - Health Ombudsman at national level [12] - Health Oversight Authority at the national level [13] - Health Professional Regulatory bodies at the national level[13] - Complaint handling committees at national and county level[12] - Patient rights charters at facility level[12, 14, 15] - Suggestion boxes at facility level [12, 15-18] - Annual patient satisfaction surveys/Client Exit interviews at health facility level[12] - Service charter at facility level [15] | - District/County Health Management Board at county level[15-17, 19] - District/County Health Stakeholders Forum at district/county level [20] - County Primary Health Advisory Committee[18] - Public participation meetings at ward and sub-county levels [2, 3] - Sub-county Primary Health Advisory Committee[18] - Health Facility Committees within peripheral facilities[15, 20-23] - Community health Committees at community level[20, 24, 25] |
| **South Africa** |  |
| - Presidential Hotline at national level [9] - Office of Health Standards Compliance at National level[26] - Health Ombudsman at national level[26] - Complaints management system from facility level upwards to district and provincial level[10, 27, 28] - District Health Council - Patients rights charters at facility level[29] - Patient experience of care surveys at facility level[30]   Patient safety committees at facility level[31] | - PHC Outreach teams (composed of Community Health Workers and Healthcare Workers) at facility level [32] - Ward committees[33] - Community and health facility committees [26, 27] - Imbizo (Public hearings at community level)[33] |

1. *Constitution of Kenya.* 2010.

2. *Public Finance Management Act* 2012, Government of Kenya: Nairobi.

3. *County Public Participation Guidelines*. 2016, Ministry of Devolution and Planning: Nairobi, Kenya.

4. *Urban Areas and Cities Act*. 2011.

5. *County Governments Act* 2012, Government of Kenya: Nairobi.

6. *Constitution of the Republic of South Africa*. 1996.

7. *Medico-Legal Declaration*. 2016, Department of Health: Pretoria.

8. *Medico-Legal Declaration Implementation Plan* 2016, Department of Health: Pretoria.

9. *Framework for Strengthening Citizen-Government Partnerships for Monitoring Frontline Service Delivery*. 2013, The Presidency; Department of Perfomance Monitoring and Evaluation: Pretoria.

10. *White Paper for the transformation of the health system in South Africa*. 1997, Department of Health: Pretoria, South Africa.

11. *Batho Pele-"People First" White Paper on Transforming Public Service Delivery*. 1997, Department of Public Service and Administration: Pretoria, South Africa.

12. *Accelerating the attainment of Health Goals: The Kenya Health Sector Strategic and Investment Plan-KHSSPJuly 2012-2017*. 2012, MOMS and MOPH: Nairobi Kenya.

13. *Health Act 2017*. 2017, Government of Kenya: Nairobi.

14. *Patient Charter, 2013*. 2013, Ministry of Health: Nairobi.

15. *National Health Strategic Plan II (2005-2010)*. 2005.

16. *Community Strategy Implementation Guidelines for Managers of the Kenya Essential Package for Health at the Community Level*. 2006, Ministry of Health: Nairobi.

17. *The Kenya Health Policy and Framework 1994-2010*. 1994, Government of Kenya: Nairobi.

18. *The Kenya Primary Healthcare Strategy 2019-2024*. 2019, Government of Kenya: Nairobi.

19. *Kenya Health Sector Strategic Plan I 1999-2004*. 1999, Government of Kenya: Nairobi.

20. *Community Strategy Implementation guidelines 2006-2010*. 2007, Government of Kenya: Nairobi.

21. *Legislative Supplement no 67, Supplement no 123*. 2007, Republic of Kenya: Nairobi.

22. *Legislative Supplement No 25, Kenya Gazette Supplement, No 67*. 2009, Republic of Kenya: Nairobi.

23. *Taking the Kenya Essential Package of Health to the Community*. 2006, Government of Kenya: Nairobi.

24. *Strategy for Community Health 2014-2019*. 2014, Government of Kenya: Nairobi.

25. *Kenya Community Health Policy 2020-2030*. 2020, Ministry of Health: Nairobi.

26. *National Health Amendment Act of 2013*. 2013, Republic of South Africa: The Presidency: Pretoria.

27. *National Health Act 2003*. 2003, Republic of South Africa: The Presidency: Pretoria.

28. *National guideline to manage complaints, compliments and suggestions in the health sector of South Africa*. 2017, Department of Health; Republic of South Africa: Pretoria.

29. *Patients Rights Charter*. 1999, National Department of Health: Pretoria.

30. *National guideline on conducting patient experience of care surveys in public health establishments*. 2017, Department of Health; Republic of South Africa: Pretoria.

31. *National guideline for patient safety incident reporting and learning in the public health sector of South Africa*. 2017, Department of Health; Republic of South Africa: Pretoria.

32. *Policy framework and strategy for Ward-based Primary Healthcare Outreach Teams (2018/2019-2023/24*. 2018, Department of Health: Pretoria.

33. *Guide on Public Participation in the Public Service*. Undated, Department of Public Service and Administation: Republic of South Africa: Pretoria.
